# Supplementary material
Source: MDPI journal article supplement (https://www.mdpi.com/2311-5637/10/3/159)
Supplement: s1 [file s1]

## Supplementary material

**Table S1.** Electrochemical parameters determined from potentiodynamic polarization data of galvanized steel curves in various solutions (K–GS) Kombucha without and (K+GS) with galvanized steel coupon at 3, 7, 10 and 14 days incubation. The acidified black tea (atea) was used to represent the initial stage.

| Samples | $E_{\text{corr}}$ (mV) | $J_{\text{corr}}$ ( $\mu\text{A}/\text{cm}^2$ ) | $\beta_c$ (mV) | $\beta_a$ (mV) |
|---------|------------------------|-------------------------------------------------|----------------|----------------|
| Atea    | -1057                  | 26                                              | -340           | 130            |
| K-GS    |                        |                                                 |                |                |
| 3d      | $-1063 \pm 3$          | $22 \pm 9$                                      | $-283 \pm 49$  | $138 \pm 30$   |
| 7d      | $-1050 \pm 8$          | $26 \pm 2$                                      | $-261 \pm 3$   | $113 \pm 18$   |
| 10d     | $-1046 \pm 6$          | $48 \pm 9$                                      | $-280 \pm 15$  | $129 \pm 7$    |
| 14d     | $-1031 \pm 6$          | $74 \pm 2$                                      | $-285 \pm 14$  | $126 \pm 15$   |
| K+GS    |                        |                                                 |                |                |
| 3d      | $-1080 \pm 2$          | $39 \pm 5$                                      | $-298 \pm 21$  | $156 \pm 2$    |
| 7d      | $-1048 \pm 2$          | $51 \pm 2$                                      | $-258 \pm 6$   | $133 \pm 4$    |
| 10d     | $-1032 \pm 1$          | $71 \pm 0$                                      | $-305 \pm 5$   | $183 \pm 9$    |
| 14d     | $-1017 \pm 6$          | $68 \pm 1$                                      | $-282 \pm 2$   | $165 \pm 11$   |

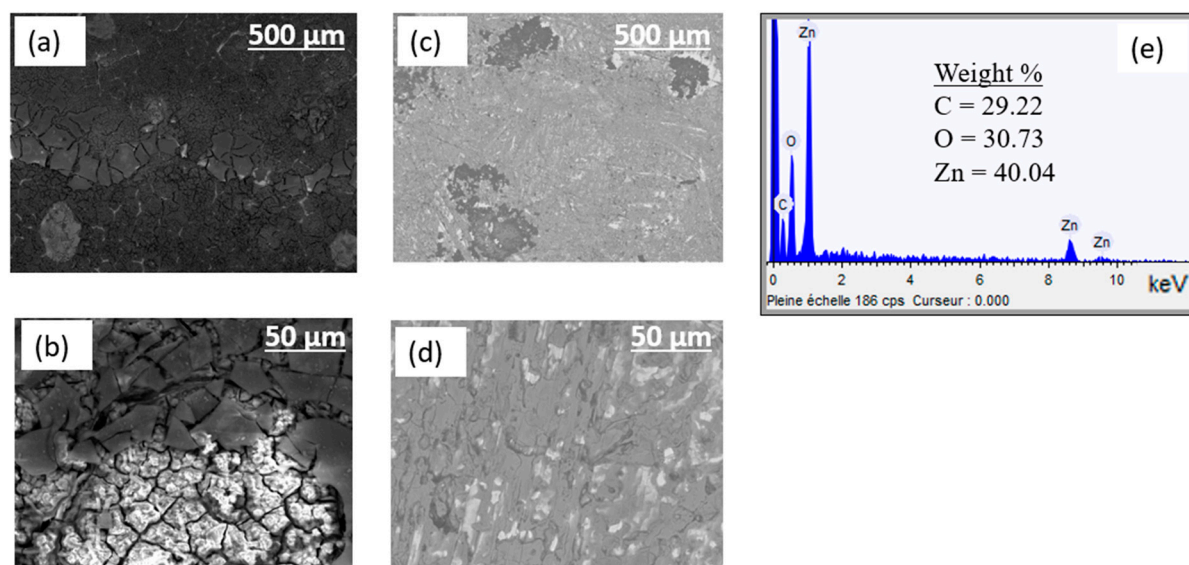

**Figure S1.** SEM images of galvanized steel coupons (a–b) after 14-days of immersion test in abiotic medium and (c–d) after removing corrosion products. EDS analysis (e) after removing corrosion products.

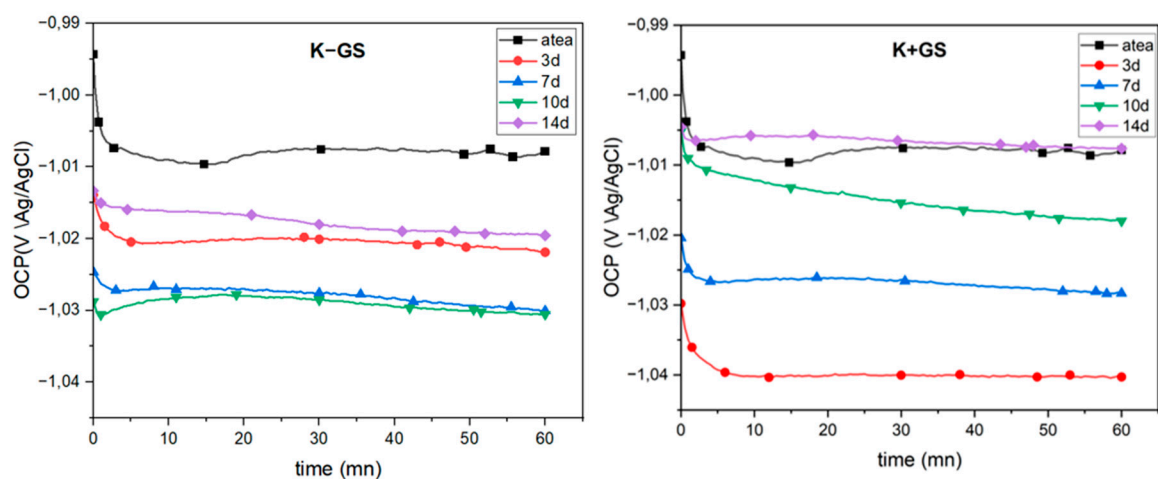

**Figure S2.** Open circuit potential (OCP) vs. time curves of galvanized steel coupon immersed in various solutions (K–GS) Kombucha without and (K+GS) with galvanized steel coupon at 3. 7. 10 and 14 days of fermentation. The acidified black tea (atea) was used to represent the initial stage.

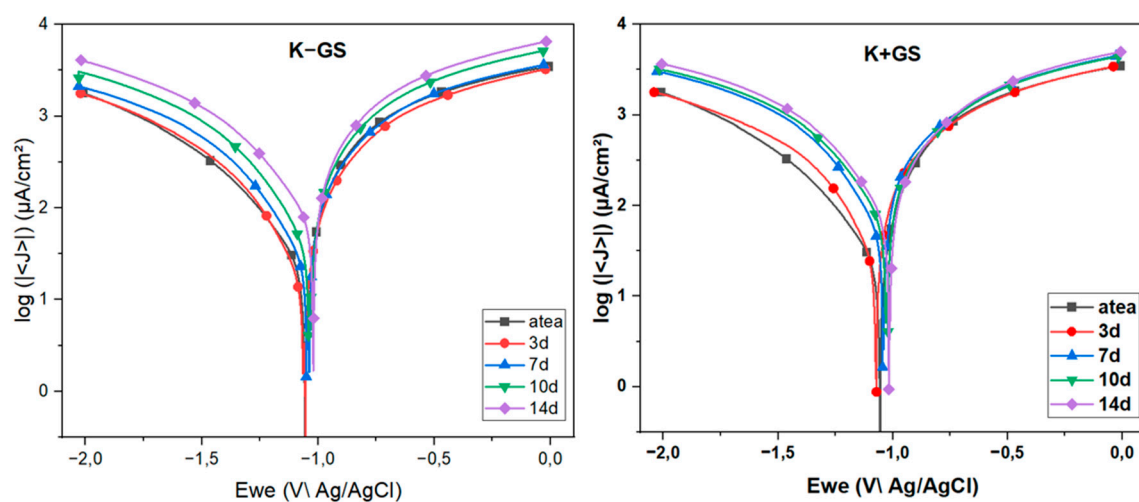

**Figure S3.** Potentiodynamic polarization curves of galvanized steel coupon immersed in various solutions (K–GS) Kombucha without and (K+GS) with galvanized steel coupon at 0. 3. 7. 10 and 14 days incubation. The acidified black tea (atea) was used to represent the initial stage.

**Table S2.** Extracted eigenvectors: correlations between variables and factors ( $J_{\text{corr}}$ : corrosion current density,  $E_{\text{corr}}$ : corrosion potential).

|                   | Coefficients of PC1 | Coefficients of PC2 |
|-------------------|---------------------|---------------------|
| pH                | -0.372              | 0.219               |
| Sucrose           | -0.402              | -0.010              |
| Glucose           | -0.355              | -0.072              |
| Fructose          | 0.331               | -0.135              |
| Acetic Acid       | 0.397               | 0.014               |
| Ethanol           | 0.393               | 0.008               |
| $E_{\text{corr}}$ | 0.104               | 0.963               |
| $J_{\text{corr}}$ | 0.377               | -0.032              |

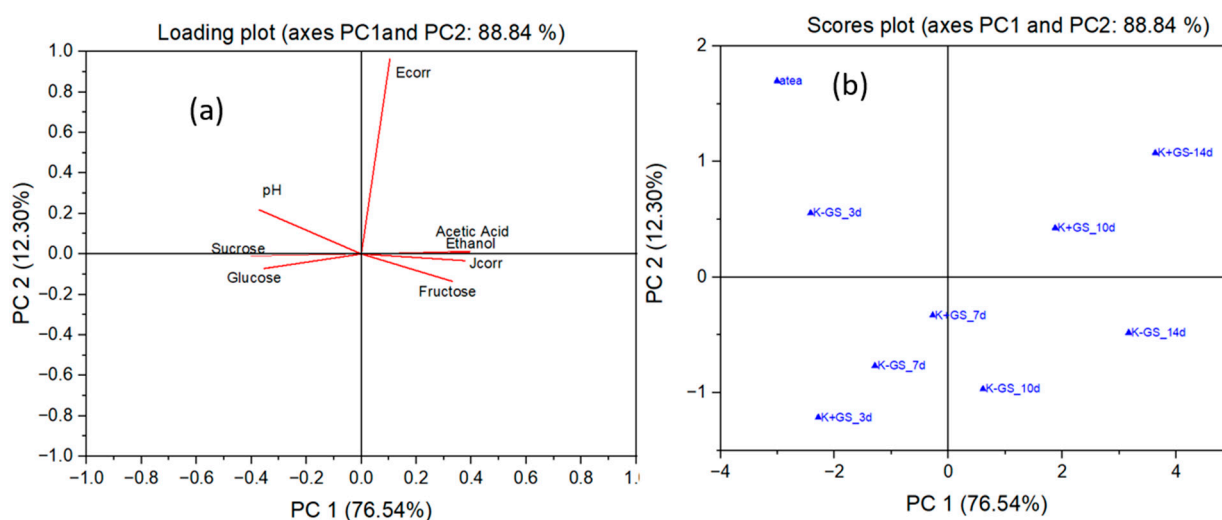

**Figure S4.** Principal components analysis “loading plot (a),” and “scores plot (b)” of the acidified black tea (atea) and kombucha fermented samples without (K–GS) and with Galvanized steel coupons about the physicochemical ( $J_{\text{corr}}$ : corrosion current density,  $E_{\text{corr}}$ : corrosion potential) parameters based on the fermentation time (3d, 7d, 10d, and 14d).

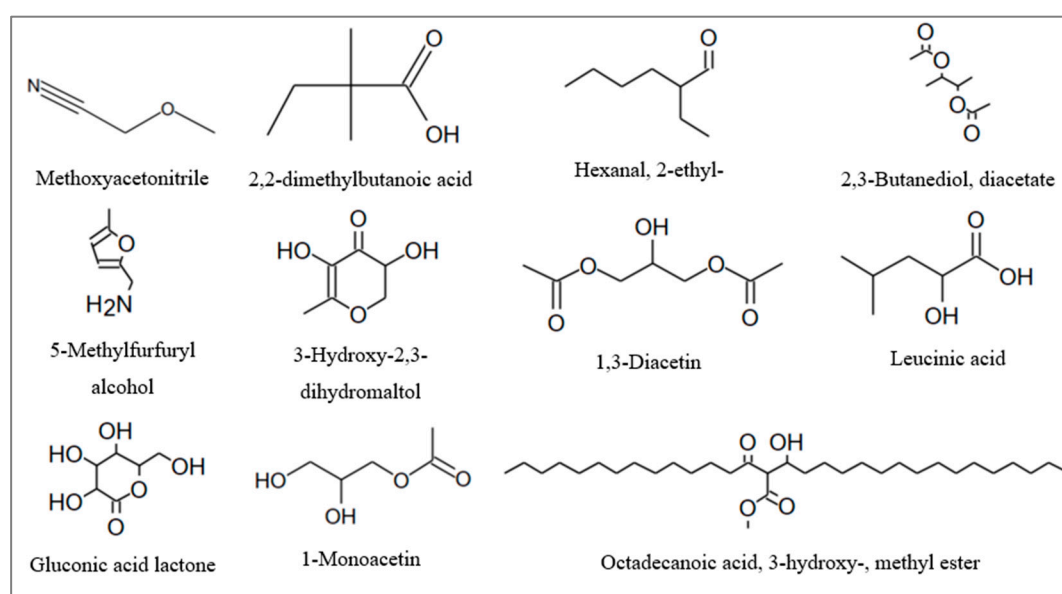

**Figure S5.** Compounds firstly identified in kombucha black tea (K+GS) in the presence of galvanized steel coupons by GC-MS.
